# Supplementary material
Source: publisher site journal article supplement (https://www.degruyterbrill.com/publication/isbn/9783110452228/downloadAsset/9783110452228_Gramsch_Kap14.pdf)
Supplement: Supplementary file 1 [file 9783110452228_Gramsch_Kap14.pdf]

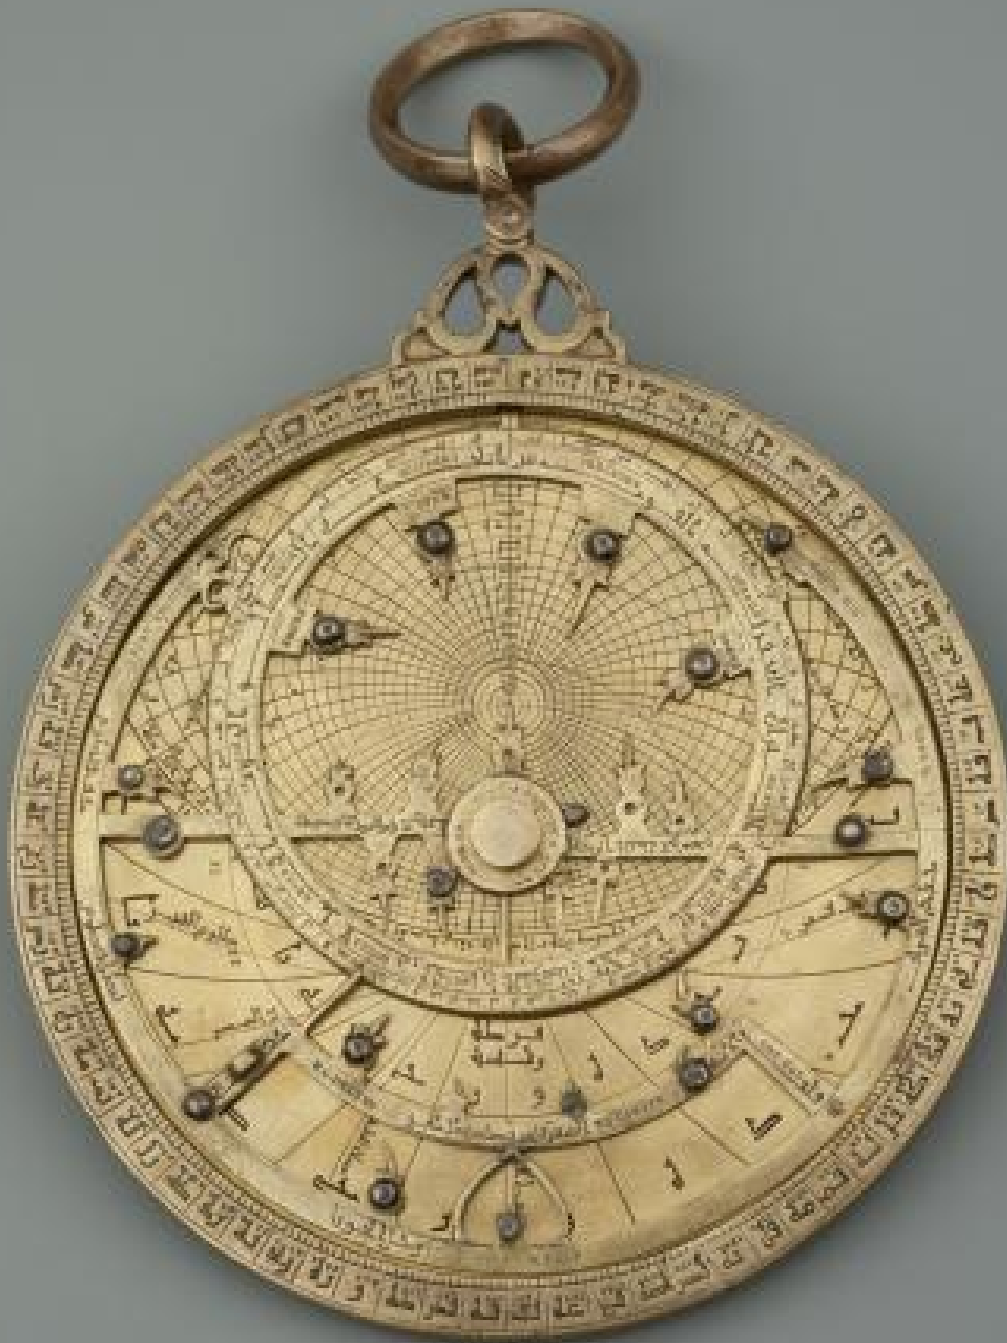

Gramsch-Stehfest, S. 213 (= Abb. 12):

**Astrolabium**, angefertigt in Cordoba 1054, heute in der Sammlung des Museums der Jagiellonen-Universität Krakau;

**Quelle:**

[http://www.maius.uj.edu.pl/en\\_GB/wystawy/stale/pokoj-kopernika](http://www.maius.uj.edu.pl/en_GB/wystawy/stale/pokoj-kopernika), Bild 3

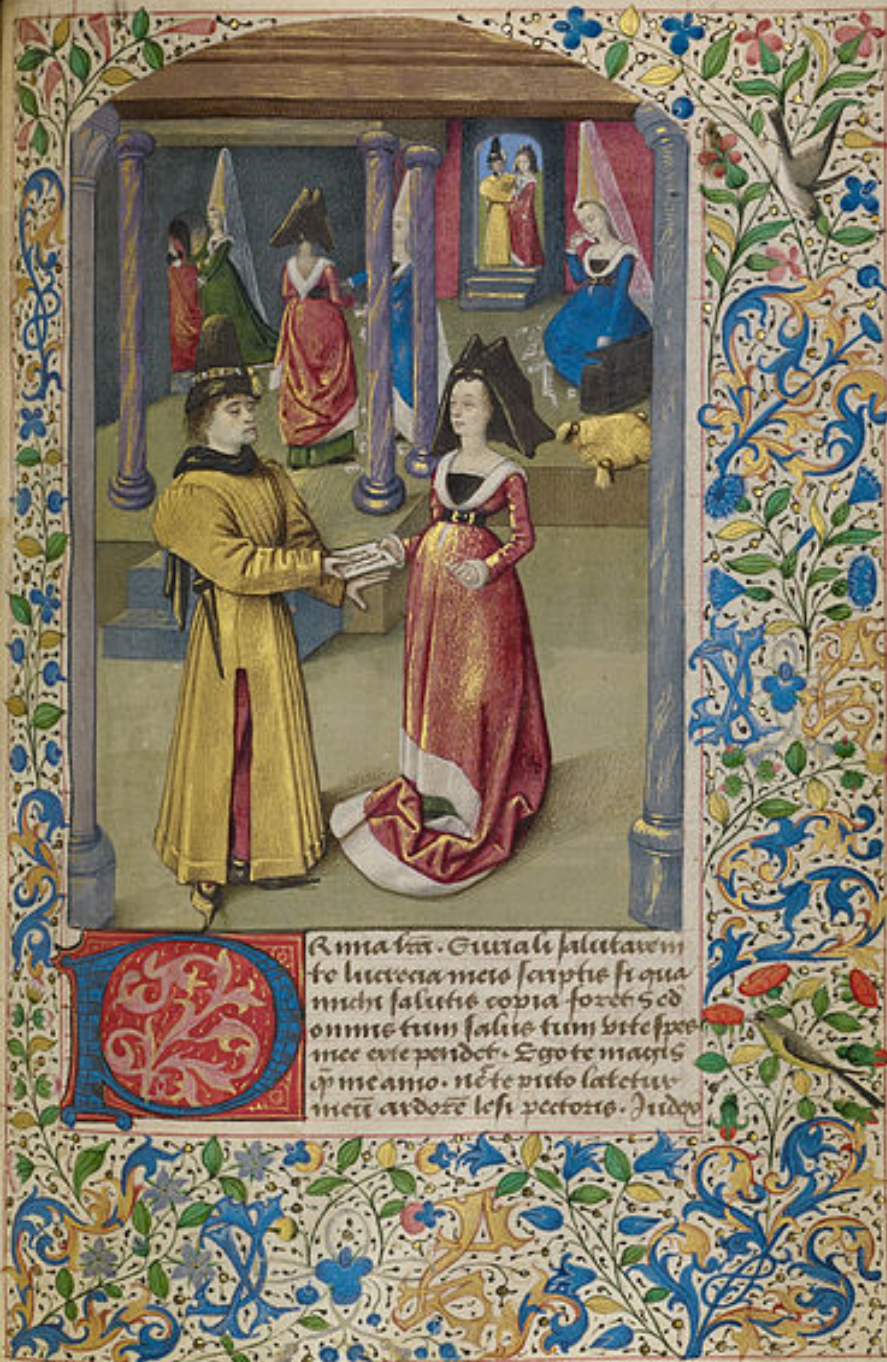

Gramsch-Stehfest, S. 216:

**Illustration zur Novelle *Historia de duobus amantibus***  
(Euryalus und Lucretia) des Enea Silvio Piccolomini (verfasst 1444) in einer französischen Handschrift (um 1460).

Der verliebte Euryalus übergibt einer Kupplerin einen Liebesbrief für Lukretia (im Vordergrund). Im Hintergrund links ist die Übergabe des Briefs dargestellt, welcher von der sitzenden Lukretia sogleich zerrissen wird; rechts erkennt man Lukretia, wie sie den zerrissenen Brief des von ihr heimlich schon Geliebten zusammensammelt und in einer Truhe verschließt. Die Geschichte endet tragisch: Als Euryalus Lukretias Heimatstadt Siena verlassen muss, stirbt sie an gebrochenem Herzen.

**Quelle:**

[https://commons.wikimedia.org/wiki/File:Euryalus\\_Sends\\_His\\_First\\_Letter\\_to\\_Lucretia\\_-\\_Google\\_Art\\_Project.jpg](https://commons.wikimedia.org/wiki/File:Euryalus_Sends_His_First_Letter_to_Lucretia_-_Google_Art_Project.jpg)

Gramsch-Stehfest, S. 218:

Das **Rektoratsblatt des Erfurter Humanisten Crotus Rubeanus** (Johannes Jäger) in der Erfurter Universitätsmatrikel vom Wintersemester 1520/21. Prominent ist das sprechende Wappen des Johannes Jäger (ein Jagdhorn) in der Mitte platziert, umgeben von den Wappen und Namen seiner Humanistenfreunde.

**Link:** <http://www.literaturland-thueringen.de/wp-content/uploads/2015/01/Rektoratsblatt-Rubeanus-418x548.jpg>

(siehe auch: <http://www.literaturland-thueringen.de/personen/crotus-rubeanus/>)

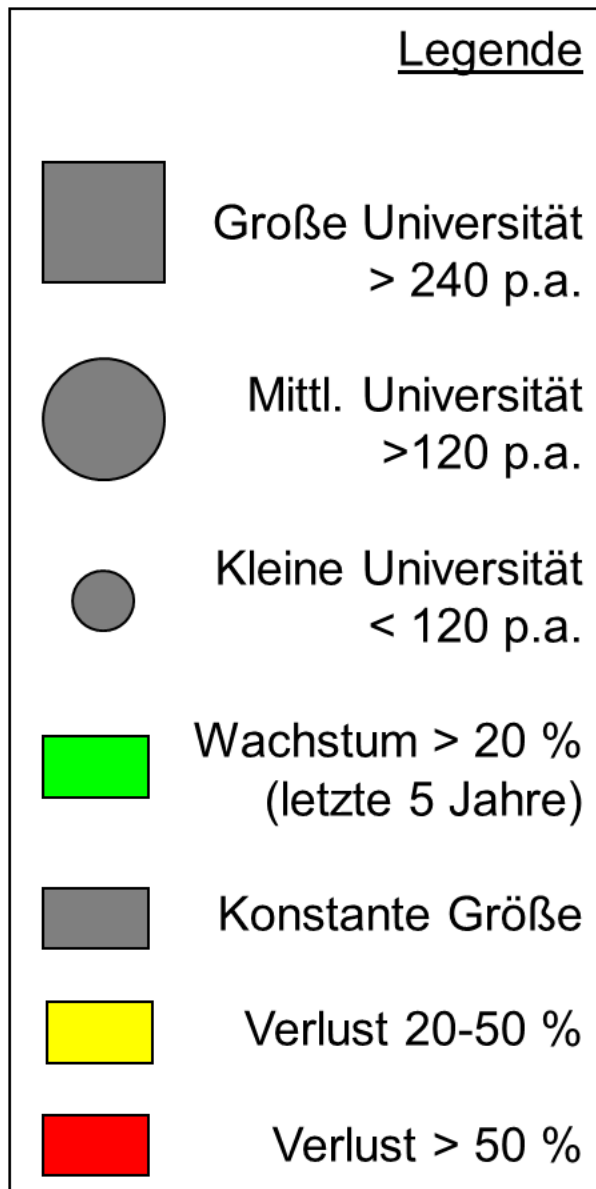

Gramsch-Stehfest, S. 222:

Zeichenerklärung zur Graphik auf der folgenden Seite:

**Frequenzwachstum und –zusammenbruch der deutschen Universitäten zwischen 1500 und 1530.** Große Universitäten (gemessen an der Besucherzahl) werden durch Quadrate, mittlere und kleine durch unterschiedlich große Kreise gekennzeichnet. Die Einfärbung der Symbole kennzeichnet die Entwicklung der Universitäten innerhalb von je 5 Jahren, zwischen grün (Wachstum) und rot (Schrumpfung).

**Quelle:** Graphik des Vf., auch publiziert in:

Robert Gramsch, Zwischen „Überfüllungskrise“ und neuen Bildungsinhalten: Universitätsbesuch und universitärer Strukturwandel in Deutschland am Ende des Mittelalters (ca. 1470 bis 1530), in: Werner Greiling / Armin Kohnle / Uwe Schirmer (Hgg.), Negative Implikationen der Reformation? Gesellschaftliche Transformationsprozesse 1470-1620 (Quellen und Forschungen zu Thüringen im Zeitalter der Reformation, 4), Köln / Weimar / Wien 2015, S. 55-80.



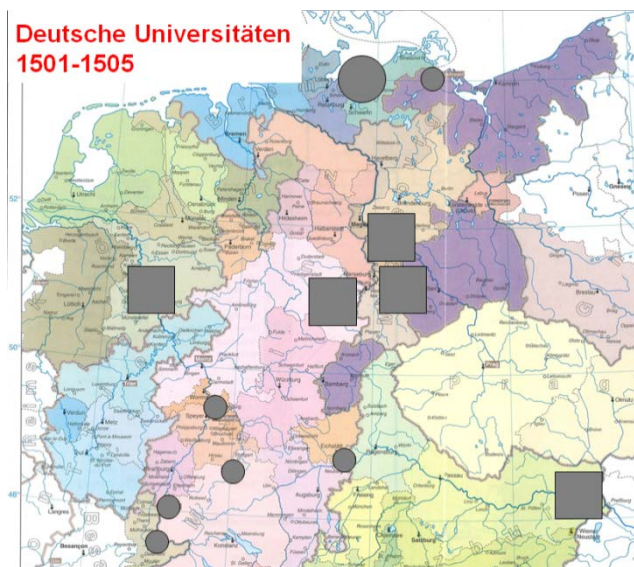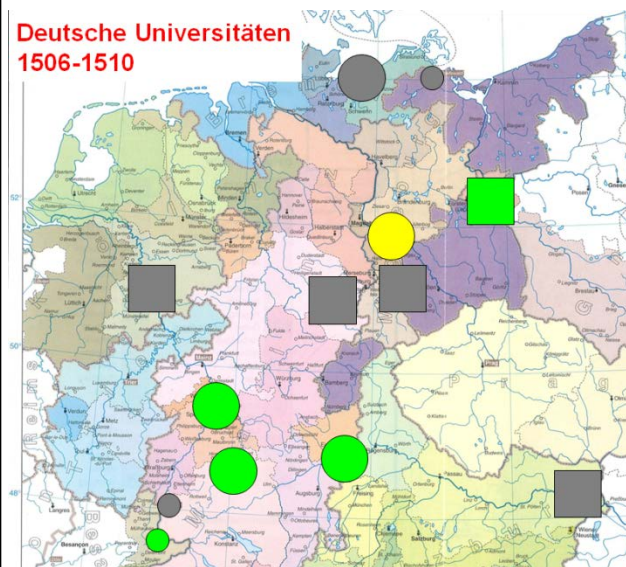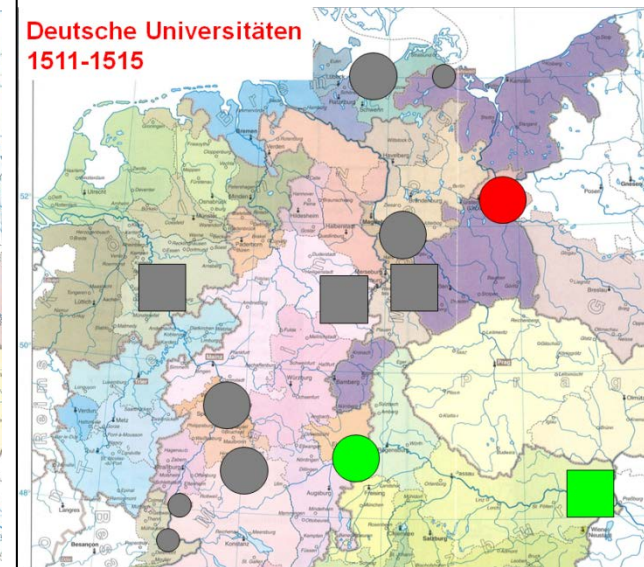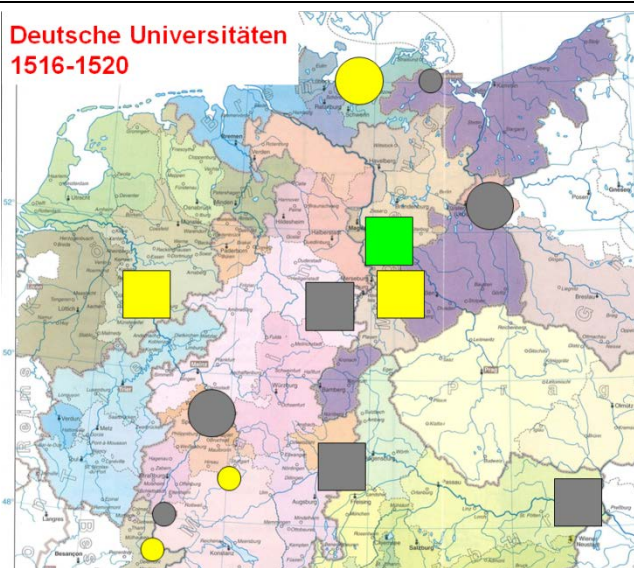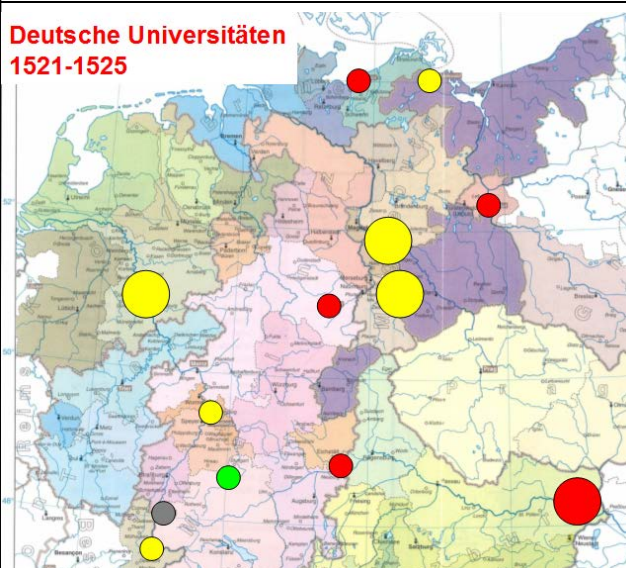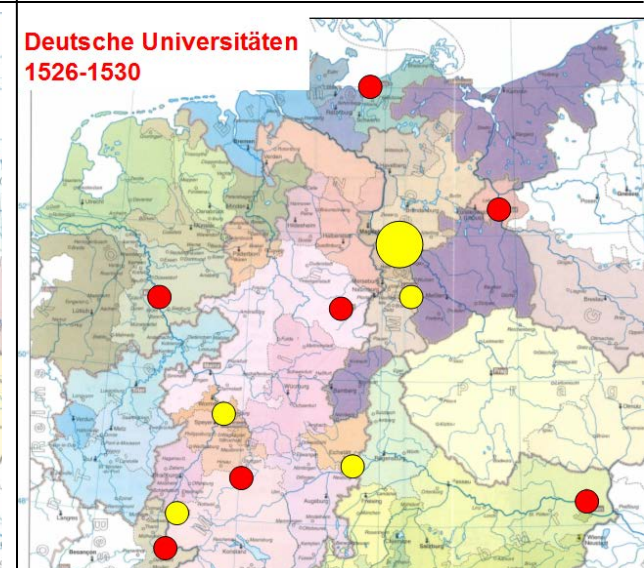

Gramsch-Stehfest, S. 222 (Fortsetzung):

**Frequenzwachstum und –zusammenbruch der deutschen Universitäten zwischen 1500 und 1530.** Große Universitäten (gemessen an der Besucherzahl) werden durch Quadrate, mittlere und kleine durch unterschiedlich große Kreise gekennzeichnet. Die Einfärbung der Symbole kennzeichnet die Entwicklung der Universitäten innerhalb von je 5 Jahren, zwischen grün (Wachstum) und rot (Schrumpfung). Deutlich tritt der massive Niedergang der Universitäten nach 1520 hervor.
